# Supplementary material
Source: Springer Nature journal article supplement (https://www.springermedizin.de/resource/supplementary/12889_2013_6788_MOESM1_ESM.pdf/9499024)
Supplement: MOESM1 [file 9499024]

## EMOTIONAL-FEELING DIMENSION

- Psychological support for elaborating and accepting the diagnosis
- Elaboration of a better self image (from «diabetic» to «person»)
- Support for avoiding isolation and constructing good social relationship
- Motivational intervention for becoming able to focus on small daily success, rather than to chronicity of cure
- Good doctor-patient relationship for feeling understood and held
- To feel “guided”
- To feel partner, not alone
- Fostering “positive” approach to care&cure

## COGNITIVE-THINKING DIMENSION

- Deep information on the disease characteristics, life expectation and the rationale of therapy and lifestyle change
- Deep information on therapies function, value and rationale
- Support to recognize symptoms and signs related to one's own health status
- Supports for translating abstract medical “recipes” into practical conducts
- Supports (like reminders) to assist the patients in their daily adherence to treatment and to seasonal controls

## PATIENT HEALTH ENGAGEMENT

## BEHAVIORAL-COGNITIVE DIMENSION

- Better integrated care (i.e. synergy from hospital to territorial care system)
- Improved access to healthcare (for controls, for therapies...)
- Accessible infrastructure (for physical activities; for social activities...)
- Improved patient-doctor communication (with remote monitoring technology, with dedicated toll free numbers...)
- Devices that support the patient in measuring calories, physical activity, level of glycaemia...)
